# Supplementary material for: CYP2D6 gene resequencing in the Malagasy, a population at the crossroads between Asia and Africa: a pilot study
Source: Pharmacogenomics. 2022 Mar 1;23(5):315–25. doi: 10.2217/pgs-2021-0146 (PMC8965795; doi:10.2217/pgs-2021-0146)
Supplement: Supplementary file 2 [file pgs-23-315-s2.xlsx]

## Sheet: Sheet1
Supplementary Table 2: Novel variant positions not previously annotated in PharmVar in 23 Malagasy samples
		Upstream	Upstream	Upstream	Intron 1	Intron 2	Intron 2	Intron 2	Intron 2	Exon 3	Intron 4	Exon 5	Exon 7	Intron 7	Intron 7	Intron 7	Intron 8
	TaqManTM-based	-892C>A	-819C>A	-18A>C	581G>C	1227C>G	1282G>T	1361G>C	1549G>A	1607G>T	2279G>A	2468G>A	3187A>C	3534C>A	3562G>C	3636C>T	4034C>T
Sample ID	Genotype									Gly118Val		Leu231Leu	Ile339Leu
1141018	*1 /*2	0	0	0	0	0	0	0	0	0	1	0	0	0	0	0	1
1151003	*2 /*10	0	0	0	0	0	0	0	0	0	1	0	0	0	0	0	1
1151005	*2 /*29	0	0	0	0	0	0	0	0	0	1	0	0	0	0	0	1
2211019	*2 /*36+*10	0	0	0	0	0	0	0	0	0	1	0	0	0	0	0	1
2211072	*2 /*36+*10	0	0	0	0	0	0	0	0	0	1	0	0	0	0	0	1
2211066	*1 /*2	0	0	0	0	0	0	0	0	0	1	0	0	0	0	0	1
1134123	*1 /*1	1	0	0	0	0	0	0	0	0	0	0	0	0	0	0	0
1040709	*1 /*10	0	0	0	0	0	0	0	0	0	0	1	0	0	0	0	0
3021501	*1 /*17	0	0	0	0	0	0	0	0	0	0	0	0	0	1	0	0
1040105	*1 /*2	0	1	1	0	0	0	0	0	0	0	0	0	0	0	0	0
1141013	*1 /*29	0	0	0	0	0	0	0	0	0	0	0	0	0	0	1	0
1151006	*1 /*29	0	0	0	0	0	0	0	0	0	0	0	0	1	0	0	0
1134144	*1 /*35x2	0	0	0	0	0	0	0	0	0	0	0	0	1	0	0	0
2090204	*1 /*41	0	0	0	0	0	1	0	0	0	0	0	0	0	0	0	0
2021405	*1 /*45	0	0	0	1	0	0	0	0	0	0	0	0	0	0	0	0
1141037	*1 /*4x2	0	0	0	0	1	0	0	0	0	0	0	0	0	0	0	0
1134181	*10 /*41	0	0	0	0	0	2	0	0	0	0	0	0	0	0	0	0
2090909	*17 /*41	0	0	0	0	0	1	0	0	0	0	0	0	0	0	0	0
1031606	*2 /*17	0	0	0	0	0	0	2	1	0	0	0	0	0	0	0	0
1134167	*2 /*41	0	0	0	0	0	1	0	0	0	0	0	0	0	0	0	0
1134164	*36+*10 /*41	0	0	0	0	0	1	0	0	0	0	0	0	0	0	0	0
2070705	*36+*10 /*41	0	0	0	0	0	0	0	0	0	0	0	1	0	0	0	0
2090703	*36+*10 /*41	0	0	0	0	0	1	0	0	1	0	0	0	0	0	0	0
Number of alleles :		1	1	1	1	1	7	2	1	1	6	1	1	2	1	1	6
Frequency :		0.00526316	0.00526316	0.00526316	0.00526316	0.00526316	0.0368421	0.0105263	0.00526316	0.00526316	0.0315789	0.00526316	0.00526316	0.0105263	0.00526316	0.00526316	0.0315789
0 : homozygous reference
1 : heterozygous
2 : homozygous variant
