# Supplementary material for: CYP2D6 gene resequencing in the Malagasy, a population at the crossroads between Asia and Africa: a pilot study
Source: Pharmacogenomics. 2022 Mar 1;23(5):315–25. doi: 10.2217/pgs-2021-0146 (PMC8965795; doi:10.2217/pgs-2021-0146)
Supplement: Supplementary file 3 [file pgs-23-315-s3.xlsx]

## Sheet: Sheet1
Supplementary Table 3: Frequencies of novel variant positions not previously annotated in PharmVar in gnomAD populations
Population	-892C>A	-819C>A	-18A>C	581G>C	1227C>G	1282G>T	1361G>C	1549G>A	1607G>T	2279G>A	2468G>A	3187A>C	3534C>A	3562G>C	3636C>T	4034C>T
									Gly118Val		Leu231Leu	Ile339Leu
African/African American	2.45e-05	0.0003428	0.0004233	0	N/A	0.0001216	9.722e-05	7.3e-05	N/A	0.008612	9.819e-05	0.0003645	0.0004381	0.0008525	0.0013	0.008338
Latino/Admixed American	0	0	0.0003299	0	N/A	0	0	0	N/A	0.0004624	0	0	0	0.0001312	0.0003296	0.000463
Ashkenazi Jewish	0	0	0	0	N/A	0	0	0	N/A	0	0	0	0	0	0	0
East Asian	0	0.0001934	0	0	N/A	0	0	0	N/A	0	0	0	0	0	0	0
European (non-Finnish)	0.000118	0.0003391	0.0002216	0	N/A	1.474e-05	0	0	N/A	1.477e-05	0	0	8.836e-05	0	0	1.481e-05
European (Finnish)	0	0	0	0	N/A	0	0	0	N/A	0	0	0	0	0	0	0
South Asian	0	0	0.0008393	0	N/A	0	0	0	N/A	0.0002101	0	0	0.0006247	0	0.0004196	0.0002119
Other/All other	0	0.0004826	0.0009728	9e-05	N/A	0	0	0	N/A	0.000485	0	0	0.0004803	0	0	0.0004878
Total	5.957e-05	0.000258	0.0002862	1e-05		3.958e-05	2.638e-05	1.98e-05		0.002384	2.651e-05	9.895e-05	0.0001847	0.0002441	0.0003976	0.00231
Bold: Populations that are considered ancestral to the modern Malagasy
Other/All other: Population not assigned/populations other than those listed
N/A: Frequency not available in gnomAD
